# Supplementary material
Source: Springer Nature journal article supplement (https://www.springermedizin.de/resource/supplementary/12968_2008_38_MOESM1_ESM.pdf/9577844)

A

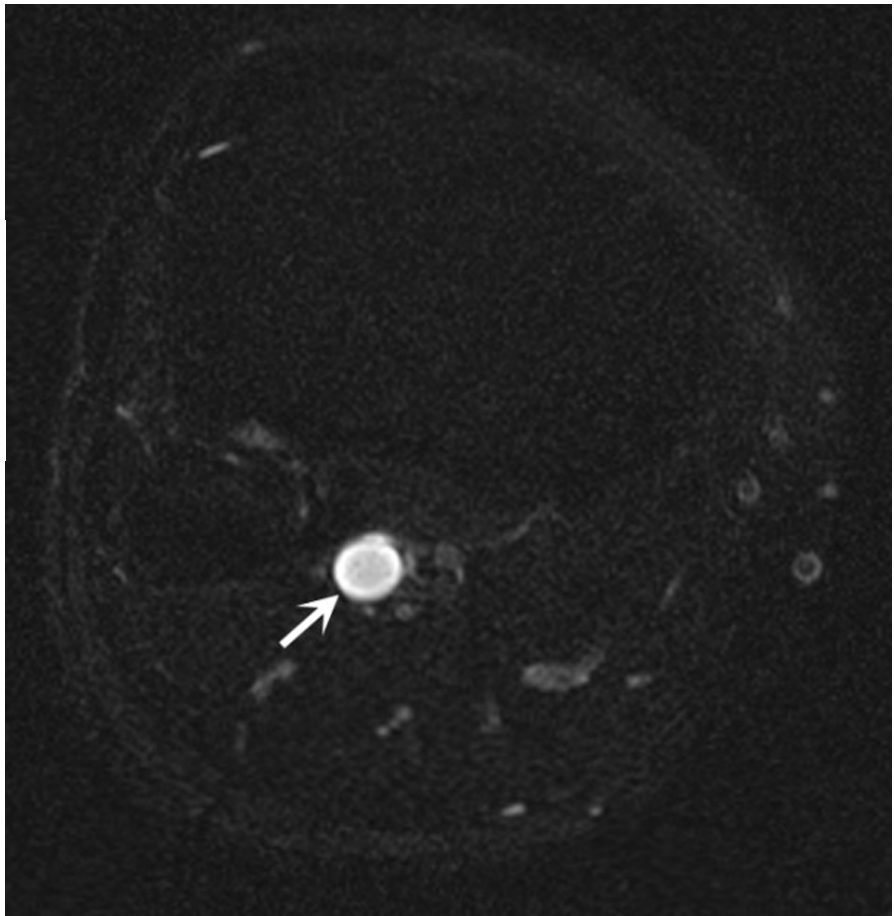

B

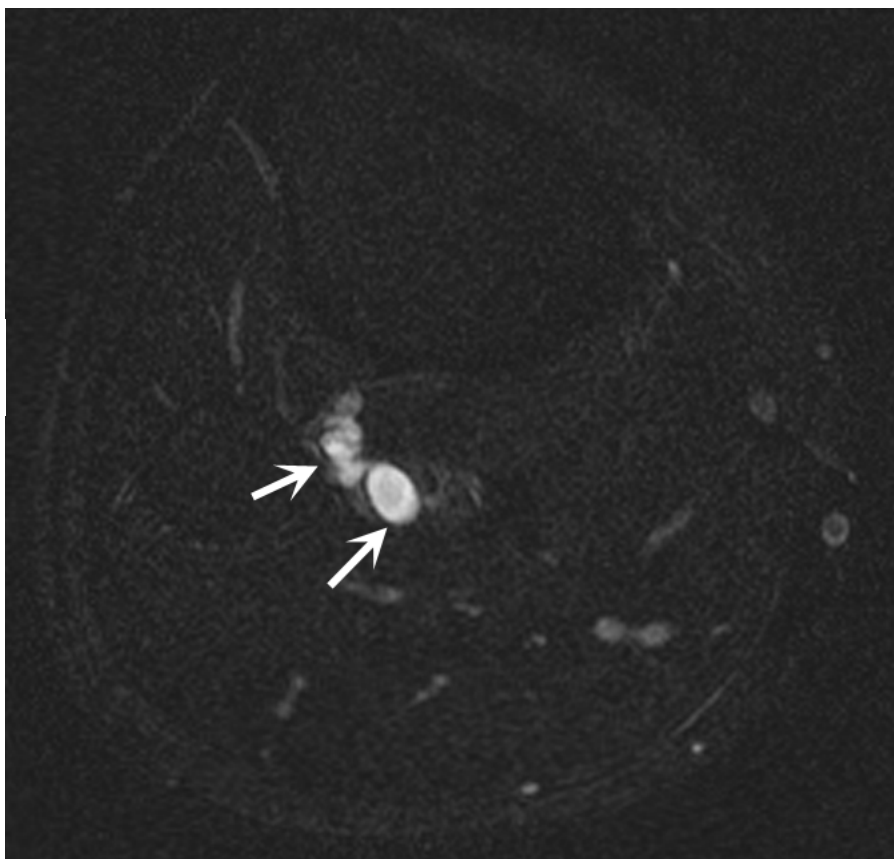

Supplement: MOESM1 [file 9577844]
